# Supplementary material for: Release of Pure H2 from Na[BH3(CH3NH)BH2(CH3NH)BH3] by Introduction of Methyl Substituents
Source: MDPI journal article supplement (doi:10.3390/inorganics11050202), 2023-05-07
Supplement: s1 [file s1]

# Release of pure H<sub>2</sub> from Na[BH<sub>3</sub>(CH<sub>3</sub>NH)BH<sub>2</sub>(CH<sub>3</sub>NH)BH<sub>3</sub>] by introduction of methyl substituents

Ting Zhang, Timothy Steenhaut Michel Devillers and Yaroslav Filinchuk\*

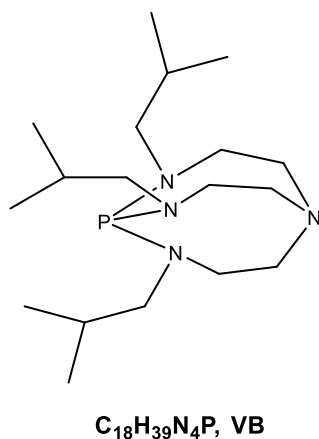

**Figure S1.** Chemical formula of VB.

**Table S1.** H-contents, mass losses and by-products formed during thermal treatment of several M[B<sub>3</sub>N<sub>2</sub>] compounds.

| Compound <sup>(reference)</sup>                                                                                                                                                | H-content (wt. %, excluding hydrogen carbon) | Mass loss below 200 °C (%) | By-products                                                                                    |
|--------------------------------------------------------------------------------------------------------------------------------------------------------------------------------|----------------------------------------------|----------------------------|------------------------------------------------------------------------------------------------|
| [Bu <sub>4</sub> N][B <sub>3</sub> N <sub>2</sub> ] <sup>35</sup>                                                                                                              | 3.8                                          | 3.0                        | None                                                                                           |
| [Et <sub>4</sub> N][B <sub>3</sub> N <sub>2</sub> ] <sup>35</sup>                                                                                                              | 6.0                                          | 6.0                        | None                                                                                           |
| [C(N <sub>3</sub> H <sub>6</sub> )] [B <sub>3</sub> N <sub>2</sub> ] <sup>35</sup>                                                                                             | 13.7                                         | 18.5                       | NH <sub>3</sub> , CH <sub>4</sub>                                                              |
| [C(N <sub>3</sub> H <sub>5</sub> CH <sub>3</sub> )] [B <sub>3</sub> N <sub>2</sub> ] <sup>35</sup>                                                                             | 11.7                                         | 8.0                        | NH <sub>3</sub> , CH <sub>4</sub>                                                              |
| [NH <sub>4</sub> ][B <sub>3</sub> N <sub>2</sub> ]<br>NH <sub>3</sub> BH <sub>2</sub> NH <sub>2</sub> BH <sub>2</sub> NH <sub>2</sub> BH <sub>3</sub><br>(1 : 3) <sup>38</sup> | : 16.4                                       | ~ 45                       | B <sub>3</sub> N <sub>3</sub> H <sub>6</sub> , B <sub>2</sub> H <sub>6</sub> , NH <sub>3</sub> |
| Li[B <sub>3</sub> N <sub>2</sub> ] <sup>33</sup>                                                                                                                               | 15.2                                         | ~ 5                        | None                                                                                           |
| Na[B <sub>3</sub> N <sub>2</sub> ] <sup>33</sup>                                                                                                                               | 12.7                                         | ~ 20                       | NH <sub>3</sub> , BNH <sub>5</sub> , B <sub>2</sub> NH <sub>7</sub>                            |

|                                        |      |           |                                     |
|----------------------------------------|------|-----------|-------------------------------------|
| $\text{K}[\text{B}_3\text{N}_2]^{34}$  | 10.8 | $\sim 36$ | $\text{NH}_3, \text{B}_2\text{H}_6$ |
| $\text{Rb}[\text{B}_3\text{N}_2]^{34}$ | 7.6  | $\sim 23$ | $\text{NH}_3, \text{B}_2\text{H}_6$ |
| $\text{Cs}[\text{B}_3\text{N}_2]^{34}$ | 5.9  | $\sim 19$ | $\text{NH}_3, \text{B}_2\text{H}_6$ |

**Table S2.** H-content in  $\text{NaNH}_2\text{BH}_3$ ,  $\text{NaBH}_3\text{NH}_2\text{BH}_3$ ,  $\text{NaBH}_3\text{NH}_2\text{BH}_2\text{NH}_2\text{BH}_3$ ,  $\text{NaBH}_3\text{NH}_2\text{BH}_2\text{NH}_2\text{BH}_2\text{NH}_2\text{BH}_3$  and  $\text{NaBH}_3\text{NH}_2\text{BH}(\text{NH}_2\text{BH}_3)_2$ .

| Compound                                                                          | Molar mass (g/mol) | H-content (wt. %) |
|-----------------------------------------------------------------------------------|--------------------|-------------------|
| $\text{NaNH}_2\text{BH}_3$                                                        | 52.85              | 9.54              |
| $\text{NaBH}_3\text{NH}_2\text{BH}_3$                                             | 66.68              | 12.09             |
| $\text{NaBH}_3\text{NH}_2\text{BH}_2\text{NH}_2\text{BH}_3$                       | 95.53              | 12.66             |
| $\text{NaBH}_3\text{NH}_2\text{BH}_2\text{NH}_2\text{BH}_2\text{NH}_2\text{BH}_3$ | 124.38             | 12.97             |
| $\text{NaBH}_3\text{NH}_2\text{BH}(\text{NH}_2\text{BH}_3)_2$                     | 124.38             | 12.97             |

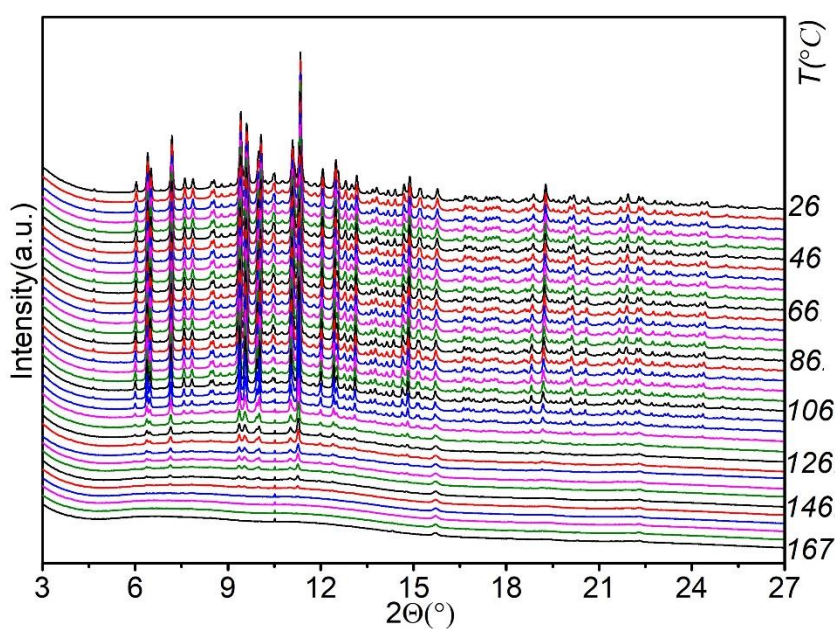

**Figure S2.** Synchrotron PXRD patterns of  $\text{Na}[\text{B}_3(\text{MeN})_2]$  ( $\lambda = 0.77509 \text{ \AA}$ )

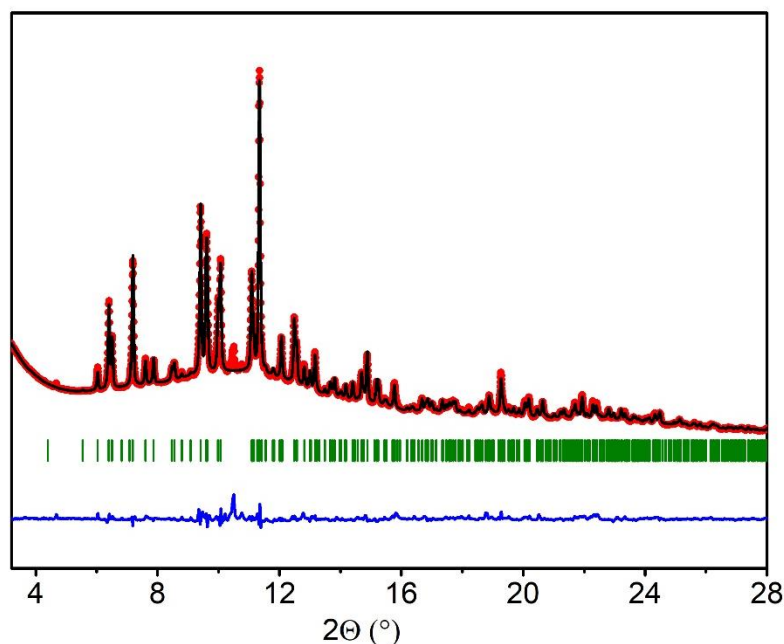

**Figure S3.** Rietveld refinement of the synchrotron PXRD pattern of  $\text{Na}[\text{B}_3(\text{MeN})_2]$  ( $\lambda = 0.77509 \text{ \AA}$ ,  $T = 300 \text{ K}$ ). Observed data ( $Y_{\text{obs}}$ ) are displayed in red, the Rietveld refinement profile ( $Y_{\text{calc}}$ ) in black and the difference plot ( $Y_{\text{obs}} - Y_{\text{calc}}$ ) in blue. Agreement factors, with background correction, are  $R_B = 7.9 \%$ ,  $R_p = 14.2$ ,  $R_{wp} = 12.5$ ,  $\chi^2 = 424$ .

**Table S3.** Inter-anion dihydrogen bond lengths and angles in  $\text{Na}[\text{B}_3(\text{MeN})_2]$ .

| $\text{N-H}^{\delta+} \cdots \text{H}^{\delta-}\text{-B}$ | $D(\text{H} \cdots \text{H}) / \text{\AA}$ | $\angle(\text{N-H} \cdots \text{H}) / ^\circ$ |
|-----------------------------------------------------------|--------------------------------------------|-----------------------------------------------|
| N(12)-H(121) ...H(212)-B(21) (terminal B)                 | 2.37                                       | 135.6                                         |
| N(22)-H(221) ...H(131)-B(13) (central B)                  | 2.13                                       | 173.8                                         |
| N(14)-H(141) ...H(251)-B(25) (terminal B)                 | 2.28                                       | 124.0                                         |
| N(24)-H(241) ...H(151)-B(15) (terminal B)                 | 2.46                                       | 159.4                                         |
| N(24)-H(241) ...H(232)-B(23) (central B)                  | 2.49                                       | 136.6                                         |

**Table S4.** B-N bond lengths in  $\text{CH}_3\text{NH}_2\text{BH}_3$ ,  $\text{M}[\text{B}_3\text{N}_2]$  ( $\text{M} = \text{Li} - \text{Cs}$ ), and  $\text{Na}[\text{B}_3(\text{MeN})_2]$  (Because of the significant disorder and presence of peaks from unidentified impurities, they modeled the structure of  $\text{Na/Li}[\text{B}_3\text{N}_2]$  in Jana2006. And B-N distances in  $\text{Na}[\text{B}_3\text{N}_2]$  were restrained to  $1.60(1) \text{ \AA}$  ).

| Compound                                          | Identification of B-N bond | Bond length ( $\text{\AA}$ ) |
|---------------------------------------------------|----------------------------|------------------------------|
| $\text{CH}_3\text{NH}_2\text{BH}_3$ <sup>43</sup> | B-N                        | 1.587(3)                     |
| $\text{Li}[\text{B}_3\text{N}_2]$ <sup>33</sup>   | B-N                        | -                            |
| $\text{Na}[\text{B}_3\text{N}_2]$ <sup>33</sup>   | B-N                        | 1.60(1)                      |
| $\text{K}[\text{B}_3\text{N}_2]$ <sup>34</sup>    | B-N (terminal B)           | 1.609(1)                     |
|                                                   | B-N (central B)            | 1.551(1)                     |
| $\text{Rb}[\text{B}_3\text{N}_2]$ <sup>34</sup>   | B-N (terminal B)           | 1.62(2) – 1.65(2)            |
|                                                   | B-N (central B)            | 1.60(2)                      |
| $\text{Cs}[\text{B}_3\text{N}_2]$ <sup>34</sup>   | B-N                        | 1.56(7) – 1.57(7)            |
|                                                   | B11-N12 (terminal B)       | 1.638(9)                     |

**Na[B<sub>3</sub>(MeN)<sub>2</sub>]**<sup>(this work)</sup>

|                      |           |
|----------------------|-----------|
| B13-N12 (central B)  | 1.620(9)  |
| B13-N14 (central B)  | 1.626(10) |
| B15-N14 (terminal B) | 1.592(9)  |
| B21-N22 (terminal B) | 1.603(8)  |
| B23-N22 (central B)  | 1.635(11) |
| B23-N24 (central B)  | 1.601(8)  |
| B25-N24 (terminal B) | 1.632(10) |

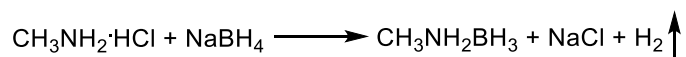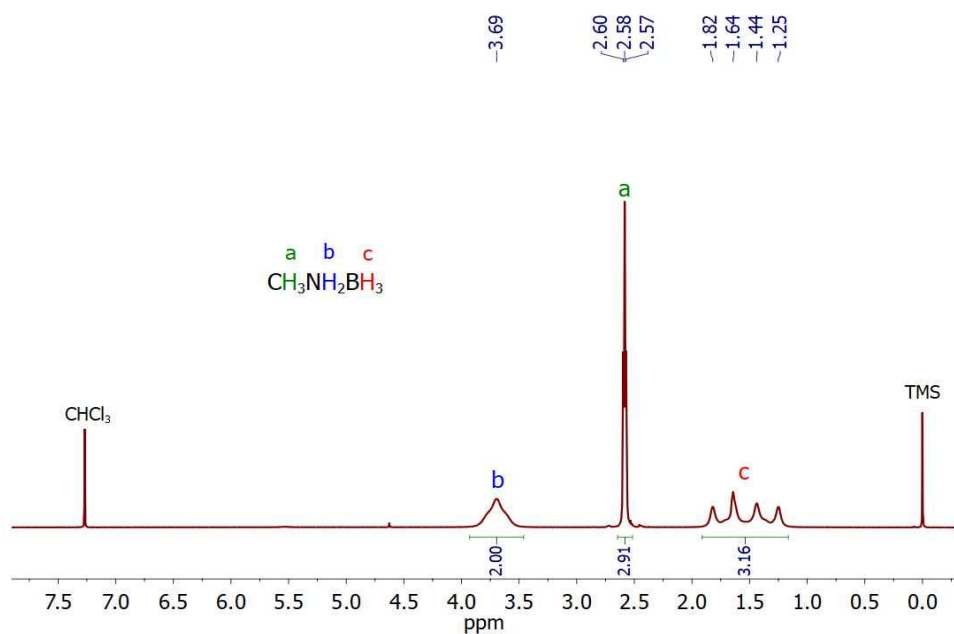

**Figure S4** <sup>1</sup>H NMR spectrum of CH<sub>3</sub>NH<sub>2</sub>BH<sub>3</sub>.

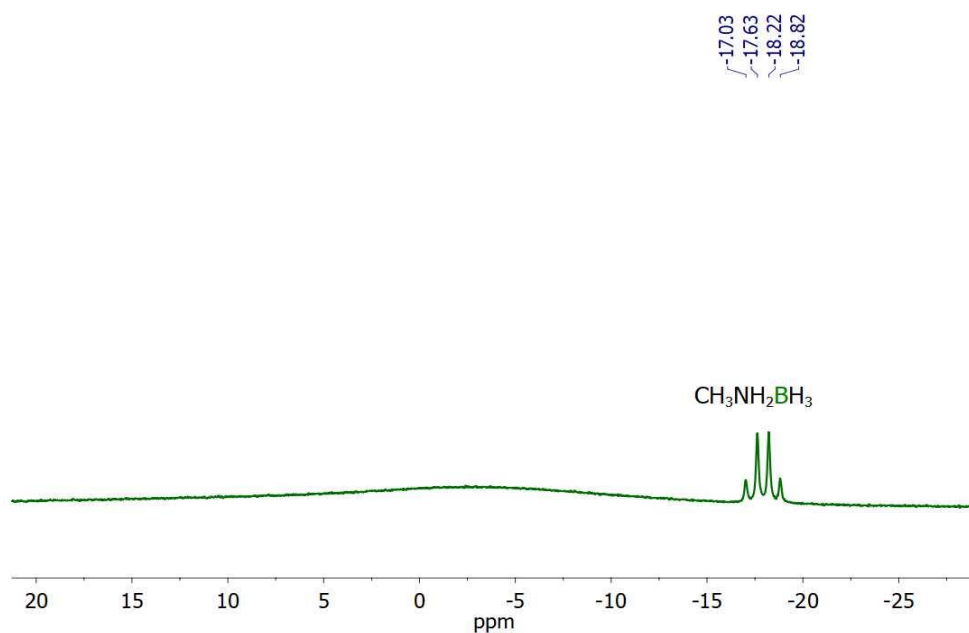

**Figure S5**  $^{11}\text{B}$  NMR spectrum of  $\text{CH}_3\text{NH}_2\text{BH}_3$ .

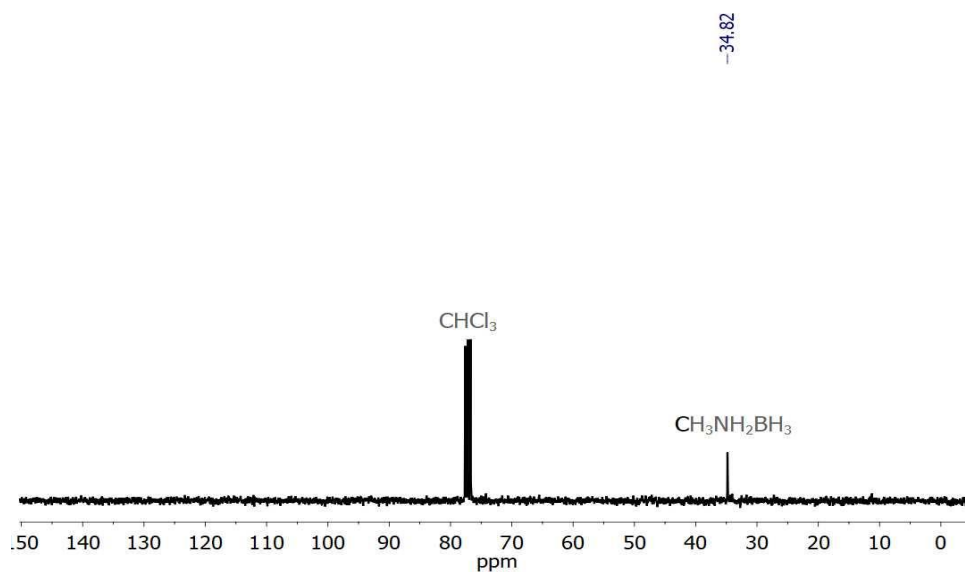

**Figure S6**  $^{13}\text{C}$  NMR spectrum of  $\text{CH}_3\text{NH}_2\text{BH}_3$ .

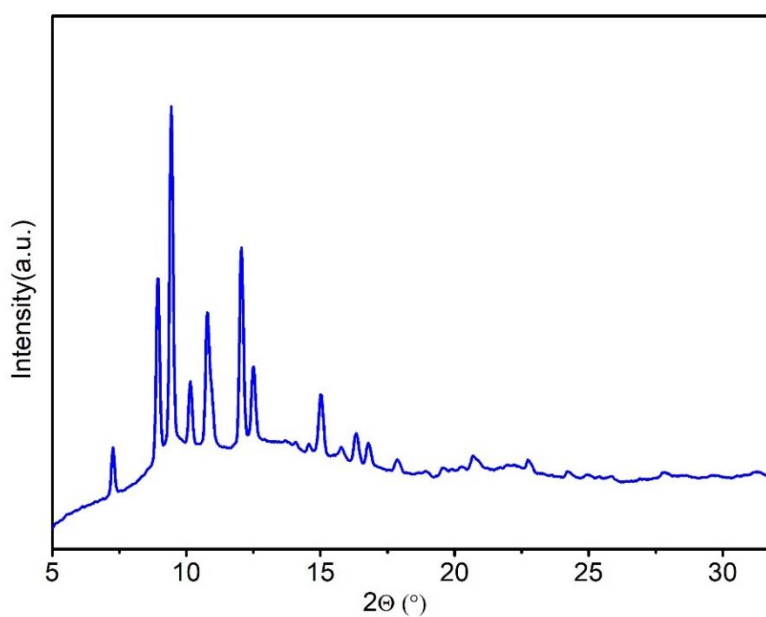

**Figure S7.** PXRD pattern of  $\text{CH}_3\text{NH}_2\text{BH}_3$  ( $\lambda = 0.71073 \text{ \AA}$ ).

**Table S5.** The mole mass, density, gravimetric and volumetric hydrogen density of  $\text{Na}[\text{B}_3(\text{MeN})_2]$

| Mole mass    | $\delta$ | Gravimetric<br>density | hydrogen | Volumetric<br>density | hydrogen |
|--------------|----------|------------------------|----------|-----------------------|----------|
| 123.58 g/mol | 973 g/L  | 13.05 %                |          | 126 g/L               |          |
